# Supplementary material for: Threatened Restrictions: The Role of Symbolic and Realistic Threat in Anti-Transgender Legislation Support
Source: Research Square preprint supplement (doi:10.21203/rs.3.rs-7753662/v1), 2025-10-28
Supplement: Supplementary file 1 [file 9a729d3bcd720d4a9840ce3b.docx]

**Study 1 Materials**

**REALISTIC THREAT (adapted from Mackey & Rios, 2025):**

Please select which of the following best describes your opinions on the following statements from (1 = Strongly disagree, 7 = Strongly agree)

- Transgender people are a safety threat when they use public restrooms or changing rooms.
- Transgender people generate undue economic stress for those around them.
- Transgender people hold too many positions of power and responsibility in this country.
- Transgender people pose a danger to children.

**SYMBOLIC THREAT (Adapted from Mackey & Rios, 2025):**

Please select which of the following best describes your opinions on the following statements from (1 = Strongly disagree, 7 = Strongly agree)

- Transgender people are harming social norms.
- Transgender people impose their values on cisgender (non-transgender) people.
- Transgender people are harming traditional gender roles.
- Transgender people are undermining our culture.

**Prejudice Measure: (negative/positive – 9-point scale)**

Please rate how you feel about the following groups according to the provided scale. (Women, Republicans, Black/African American individuals, Nonreligious individuals, Transgender individuals, Those who have recently moved residences)

**Confusion (Totton & Rios, 2021)**

- Transgender people are still figuring out who they are.
- Transgender people are confused about who they are.
- A transgender person’s sense of their own personal identity changes more throughout their life than someone who is not transgender.
- Because of the changes a transgender person experiences in their life, it takes them longer to determine who they are than a non-transgender person.

**Deception (Totton & Rios, 2021)**

- It is dishonest for a transgender person to not reveal their identity to others.
- If someone I knew from childhood told me they were a transgender person, I would feel like I did not know them at all now.
- I would feel deceived if I found out someone I knew was transgender.
- I would be upset if a friend did not tell me that they were a transgender person right away.

**Voting questions**

Imagine that each of the following pieces of legislation are being proposed in your community. How likely would you to support each on a scale from 1 = strongly oppose this legislation to 7 = strongly support this legislation

Legislation that:

1. Requires people use the bathroom of their gender assigned at birth
2. Limits participation in sports to the gender assigned at birth.
3. Restricts the types of medical care and procedures doctors are able to provide to transgender individuals.
4. Restricts conversations about transgender identities in schools and educational settings.

**Study 1 Additional Analyses**

**Table 1**

***Confusion as a Predictor of Prejudice and Legislation Support***

|  | **Prejudice** | | | **Legislation Support** | | |
| --- | --- | --- | --- | --- | --- | --- |
| **Variable** | **β** | **SE** | **ΔR2** | **β** | **SE** | **ΔR2** |
| **Step 1** |  |  |  |  |  |  |
| **Political Orientation** | -.23*** | .14 |  | .43*** | .10 |  |
|  |  |  | .16 |  |  | .32 |
| **Step 2** |  |  |  |  |  |  |
| **Confusion** | -.34*** | .09 |  | .38*** | .06 |  |

**Table 2**

***Deception as a Predictor of Prejudice and Legislation Support***

|  | **Prejudice** | | | **Legislation Support** | | |
| --- | --- | --- | --- | --- | --- | --- |
| **Variable** | **β** | **SE** | **ΔR2** | **β** | **SE** | **ΔR2** |
| **Step 1** |  |  |  |  |  |  |
| **Political Orientation** | -.23*** | .14 |  | .43*** | .10 |  |
|  |  |  | .27 |  |  | .38 |
| **Step 2** |  |  |  |  |  |  |
| **Deception** | -.49*** | .08 |  | .46*** | .06 |  |

**Table 3**

***Symbolic Threat as a Predictor of Prejudice and Legislation Support***

|  | **Prejudice** | | | **Legislation Support** | | |
| --- | --- | --- | --- | --- | --- | --- |
| **Variable** | **β** | **SE** | **ΔR2** | **β** | **SE** | **ΔR2** |
| **Step 1** |  |  |  |  |  |  |
| **Political Orientation** | -.23*** | .14 |  | .43*** | .10 |  |
|  |  |  | .47 |  |  | .62 |
| **Step 2** |  |  |  |  |  |  |
| **Symbolic Threat** | -.70*** | .06 |  | .71*** | .04 |  |

**Table 4**

***Realistic Threat as a Predictor of Prejudice and Legislation Support***

|  | **Prejudice** | | | **Legislation Support** | | |
| --- | --- | --- | --- | --- | --- | --- |
| **Variable** | **β** | **SE** | **ΔR2** | **β** | **SE** | **ΔR2** |
| **Step 1** |  |  |  |  |  |  |
| **Political Orientation** | -.23*** | .14 |  | .43*** | .10 |  |
|  |  |  | .38 |  |  | .55 |
| **Step 2** |  |  |  |  |  |  |
| **Realistic Threat** | -.62*** | .08 |  | .66*** | .05 |  |

**Study 2 Materials**

**REALISTIC THREAT**

Please select which of the following best describes your opinions on the following statements from (1 = Strongly disagree, 7 = Strongly agree)

- Transgender (gay) people are a safety threat when they use public restrooms or changing rooms.
- Transgender (gay) people generate undue economic stress for those around them.
- Transgender (gay) people hold too many positions of power and responsibility in this country.
- Transgender (gay) people pose a danger to children.

**SYMBOLIC THREAT**

Please select which of the following best describes your opinions on the following statements from (1 = Strongly disagree, 7 = Strongly agree)

- Transgender (gay) people are harming social norms.
- Transgender (gay) people impose their values on cisgender (non-transgender) people.
- Transgender (gay) people are harming traditional gender roles.
- Transgender (gay) people are undermining our culture.

**Prejudice Measure**: (negative/positive – 9-point scale)

- Please rate how you feel about the following groups according to the provided scale. (Women, Republicans, Black/African American individuals, Nonreligious individuals, Transgender individuals (gay) , Those who have recently moved residences)

**Confusion**

- Transgender (gay) people are still figuring out who they are.
- Transgender (gay) people are confused about who they are.
- A transgender (gay) person’s sense of their own personal identity changes more throughout their life than someone who is not transgender.
- Because of the changes a transgender (gay) person experiences in their life, it takes them longer to determine who they are than a non-transgender person.

**Deception**

- It is dishonest for a transgender (gay) person to not reveal their identity to others.
- If someone I knew from childhood told me they were a transgender (gay) person, I would feel like I did not know them at all now.
- I would feel deceived if I found out someone I knew was transgender (gay).
- I would be upset if a friend did not tell me that they were a transgender (gay) person right away.

**Voting questions**

Imagine that each of the following pieces of legislation are being proposed in your community. How likely would you to support each on a scale from 1 = strongly oppose this legislation to 7 = strongly support this legislation

Legislation that:

1. Restricts transgender (gay) individuals' rights to parent children.
2. Prohibits transgender (gay) individuals from donating blood.
3. Allows employers to fire employees on the basis of the employee being transgender (gay).
4. Restricts conversations about transgender (gay) identities in schools and educational settings.

**Study 2 Descriptives for Confusion and Deception**

*Means, SE, and alpha levels (where appropriate) by condition for Study 2.*

|  | **Transgender Condition** | | **Gay Condition** | |  |
| --- | --- | --- | --- | --- | --- |
| *Mean* | *SE* | *Mean* | *SE* | *Scale α* |
| *Confusion* | 4.44 | .08 | 3.30 | .08 | .88 |
| *Deception* | 3.40 | .08 | 2.27 | .08 | .91 |

**Study 2 Additional Analyses**

**Prejudice comparisons between groups based on condition**

| *Group* | *t* | *df* | *p* |
| --- | --- | --- | --- |
| *Women* | .886 | 640 | .376 |
| *Republicans* | -1.27 | 640 | .205 |
| *Black/African Americans* | 1.26 | 640 | .207 |
| *Non-religious individuals* | 1.88 | 640 | .235 |
| *Trans (gay)* | -5.16 | 640 | <.001*** |
| *People who have recently moved residences* | .31 | 640 | .759 |

*T-test comparison of prejudice based on condition*

## **Confusion**

Participants in the transgender condition expressed significantly higher levels of perceived confusion than the gay condition *F*(1, 639) = 113.07, *p* < .001, *η2p* = .151. The effect of political orientation was also significant, *F*(1, 639) = 32.95, *p* < .001, *η2p* = .049, with more conservative participants expressing higher levels of perceived confusion.

## **Deception**

Participants in the transgender condition expressed significantly higher levels of perceived deception than the gay condition *F*(1, 639) = 99.03, *p* < .001, *η2p* = .135. The effect of political orientation was also significant, *F*(1, 639) = 47.32, *p* < .001, *η2p* = .069, with more conservative participants expressing higher levels of perceived deception.
